## SOME *IN VIVO* AND *IN VITRO* CHARACTERISTICS OF *APLYSIA CALIFORNICA* HAEMOLYMPH\*

By P. L. DEFUR† AND KEN LUKOWIAK

Department of Medical Physiology, Faculty of Medicine, University of Calgary,  
Calgary, Alberta, Canada T2N 1N4

(Received 25 May 1982 – Accepted 14 June 1982)

The nervous system of the opisthobranch mollusc, *Aplysia californica* Cooper has been extensively studied and a great deal is known about the electrophysiological properties of a number of identifiable neurones (see Kandel, 1976, 1979). A variety of synaptic and electrical connections have been mapped, permitting identification of the mode in which nervous control is exerted over certain motor functions. Substantially less is known regarding other physiological systems of *Aplysia* (Kandel, 1979), particularly the respiratory system, and this limits the description of how nervous control is affected by internal physiological state. Chalazonitis & Nahas (1965) reported data for haemolymph pH, CO<sub>2</sub> tension ( $P_{\text{CO}_2}$ ) and O<sub>2</sub> tension ( $P_{\text{O}_2}$ ) in the related species, *Aplysia fasciata*, and Bevelacqua *et al.* (1975) identified the respiratory pigment, haemocyanin, in the haemolymph of *A. californica*. However, there has been no detailed study of *in vivo* oxygen levels or acid-base status of *A. californica*. Neither are there any data for the *in vitro* properties of *A. californica* haemolymph, such as oxygen carrying capacity, oxygen affinity or buffering properties. Such data are of particular importance in *A. californica*, for two reasons. Firstly, motor function, such as the often-studied gill withdrawal reflex, may be directly influenced by factors such as pH,  $P_{\text{CO}_2}$  or  $P_{\text{O}_2}$ , as are the respiratory performances of other marine invertebrates (Mangum & Burnett, 1975; McMahon & Wilkens, 1975; Bayne, 1976; Batterton & Cameron, 1978). Secondly, Chalazonitis (1974) has shown clearly that membrane potential, spike frequency and membrane resistance of many single cells in *A. fasciata* are directly affected by pH,  $P_{\text{O}_2}$  and  $P_{\text{CO}_2}$  of the bathing fluid. Therefore, the present study was undertaken to describe some of the *in vivo* and *in vitro* properties of the haemolymph of *A. californica* with regards to acid-base status and oxygenation characteristics.

*A. californica* (37–370 g) were obtained commercially from Pacific Biomarine Supply Co. (Venice, California) during September–December, 1980 or were freshly collected by hand in the vicinity of San Diego, California, January 3, 1981. Animals were transported to the University of Calgary and maintained in a recirculating sea

\* Supported by the Medical Research Council of Canada and the Alberta Heritage Foundation for Medical Research.

† Recipient of Alberta Heritage Foundation for Medical Research Fellowship, Present address: Biology Department, George Mason University, Fairfax, Virginia, 22020, U.S.A.

Table 1. *In vivo haemolymph acid-base status and oxygen levels in the pedal sinus of A. californica*, 15 °C; 32–35‰. Data are  $\bar{x} \pm 1$  S.E.

|                                    | pH                   | $P_{\text{CO}_2}$<br>(mmHg) | $C_{\text{CO}_2}$<br>(mM) | $P_{\text{O}_2}$<br>(mmHg) | $C_{\text{O}_2}$<br>(mM) | $C_{\text{O}_2}^{\text{max}}$<br>(mM) | <i>n</i> |
|------------------------------------|----------------------|-----------------------------|---------------------------|----------------------------|--------------------------|---------------------------------------|----------|
| Freshly collected<br>San Diego     | 7.522<br>$\pm 0.017$ | 3.04<br>$\pm 0.35$          | 4.48<br>$\pm 0.45$        | 26.3<br>$\pm 5.2$          | 0.038<br>$\pm 0.012$     | 0.32<br>$\pm 0.017$                   | 5        |
| Commercially<br>obtained<br>Venice | 7.560<br>$\pm 0.032$ | 3.7<br>$\pm 0.17$           | 5.30<br>$\pm 0.42$        | 39.7<br>$\pm 4.3$          | 0.060<br>$\pm 0.011$     | 0.21<br>$\pm 0.007$                   | 6        |

water system at 15 °C, 32–35‰, pH 7.9–8.1 (elevation *ca.* 1050 m). Animals from Venice, were fed once per week (Lukowiak, 1980), those from San Diego, fed *ad libitum* and all experiments were conducted within 4 weeks of animal arrival.

Haemolymph samples of 0.5–1.0 ml were withdrawn anaerobically from the pedal sinus into 1.0 ml glass syringes and immediately analysed for pH,  $\text{CO}_2$  tension ( $P_{\text{CO}_2}$ ), and  $\text{O}_2$  tension ( $P_{\text{O}_2}$ ), using Radiometer electrodes thermostatted to 15 °C and connected to an acid-base analyser (Radiometer) (deFur, Wilkes & McMahon, 1980). Additionally, total  $\text{CO}_2$  ( $C_{\text{CO}_2}$ ) was determined via the method of Cameron (1971) and total  $\text{O}_2$  was measured with a Lex- $\text{O}_2$ -Con  $\text{O}_2$  analyser.

The *in vivo* acid-base status of the two groups of animals (freshly collected from San Diego, and commercially obtained from Venice) was similar (Table 1) with no significant differences ( $P > 0.05$ ) between mean pH,  $C_{\text{CO}_2}$ , or  $P_{\text{CO}_2}$ . The non-bicarbonate buffer capacity of *A. californica* haemolymph determined *in vitro* on individual haemolymph samples from both groups of animals, according to the method of Truchot (1976), was moderate:  $\bar{x} \pm \text{S.E.} = -3.01 \pm 0.24 \text{ mM-}C_{\text{CO}_2}/\text{pH}$ ;  $n = 10$ . These pH and  $P_{\text{CO}_2}$  data agree well with those reported for the related species, *A. fasciata* (Chalazonitis & Nahas, 1965), but differ from those for the prosobranch molluscs, *Busycon canaliculatum* (Mangum & Polites, 1980) and *Pleuroploca gigantea* (P. L. deFur & P. R. H. Wilkes, unpublished). In *A. californica*, pedal haemolymph pH is lower and  $P_{\text{CO}_2}$  higher than in either species of prosobranch mollusc.

The important question is not why haemolymph pH is lower in *A. californica*, than in the two species of conch, at similar temperatures, but rather, why is  $P_{\text{CO}_2}$ , one determinant of pH, higher. In *A. californica*, the large surface area directly in contact with the sea water – much greater than in the two conch species – and the diffusion gradient across the body wall (sea water  $P_{\text{CO}_2} < 1.0$ ) should favour a loss of  $\text{CO}_2$  into the sea water. Several factors may be responsible for the higher  $P_{\text{CO}_2}$  in *A. californica*: lower cardiac output, poor vascularization of the foot and body wall, higher rate of oxidative metabolism and, therefore,  $\text{CO}_2$  production, or a greater diffusion barrier presented by the muscular body wall and foot.

Haemolymph in the pedal sinus is venous (see Kandel, 1979), yet mean pedal  $\text{O}_2$  tension ( $P_{\text{O}_2}$ ) was high in both groups of animals (Table 1).  $\text{O}_2$  content ( $C_{\text{O}_2}$ ), however, was very low (Table 1) and not significantly different ( $P > 0.05$ ) from sea water  $C_{\text{O}_2}$  at similar  $P_{\text{O}_2}$ . These low  $C_{\text{O}_2}$  values suggest that either there is no enhancement of  $\text{O}_2$  carrying capacity by a respiratory pigment, or the respiratory pigment is not saturated with  $\text{O}_2$  to any significant extent at *in vivo*  $P_{\text{O}_2}$ .

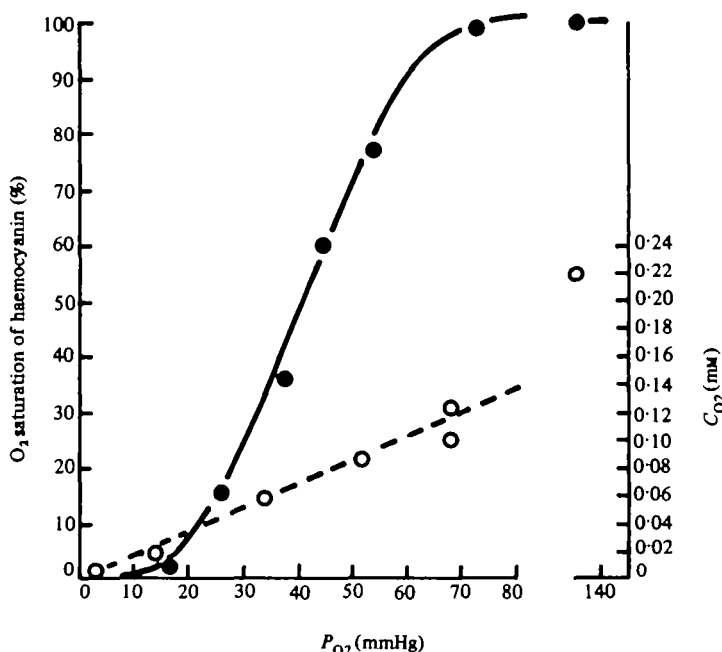

Fig. 1. Oxygen binding curve (●) for a pooled sample of *A. californica* haemolymph at 15 °C, pH 7.52,  $C_{O_2}^{max} = 0.308$  mM and the relationship between  $C_{O_2}$  and  $P_{O_2}$  (---) for a pooled sample of *A. californica* haemolymph at 15 °C, pH 7.54,  $C_{O_2}^{max} = 0.22$  mM.

Absorption spectra and  $O_2$  carrying capacities (Table 1) for *A. californica* haemolymph indicate that haemocyanin is present, but there is a wide range of haemocyanin levels in this species. Absorption spectra did show a peak in the region of 340 nm, the absorbance band for other haemocyanins (Bonaventura & Bonaventura, 1980), and the peak could be abolished by chemically deoxygenating the haemolymph. The magnitude of this peak varied considerably, however, and consistently higher absorbance values were obtained with haemolymph from animals which had been freshly collected in San Diego. Haemolymph  $O_2$  carrying capacity ( $C_{O_2}^{max}$ ) was also greater in this group of animals (Table 1), further suggesting higher haemocyanin levels.

Copper concentrations were also measured on aliquots of haemolymph that were frozen and later analysed with an atomic absorption spectrophotometer (Jarrel-Ash, Model 850), using a hollow cathode lamp (Corning). Haemolymph  $Cu^{2+}$  was  $4.5 \pm 4.3 \mu M$  ( $n = 6$ ) in *A. californica* freshly collected from San Diego, and the  $Cu$ /haemocyanin ratio (w/w) was calculated using estimates of haemocyanin concentration from the present absorption spectra and extinction coefficients for other molluscan haemocyanins (Nickerson & van Holde, 1971; van Holde & van Bruggen, 1971). The  $Cu$ /haemocyanin ratio of  $0.23 \pm 0.02\%$  ( $n = 6$ ) compares well with the values for purified haemocyanin (0.24–0.26%) for other molluscs (Ghiretti-Magaldi, Nuzzolo & Ghiretti, 1966).

The oxygen combining properties of *A. californica* haemolymph were determined on two pooled samples consisting of 1.5 ml obtained from each of five animals from each group (San Diego and Venice).  $O_2$  binding curves (Fig. 1) were obtained by

equilibrating the pooled samples at a range of  $P_{O_2}$  from 0 to 132 mmHg and  $P_{CO_2} = 3.4$  mmHg and measuring  $\dot{C}_{O_2}$ . The oxygen affinity of *A. californica* haemocyanin with a  $C_{O_2}^{max}$  of 0.088 mM was 42.0 mmHg at 15 °C, pH 7.52 (Fig. 1). Haemolymph with a  $C_{O_2}^{max}$  similar to that of sea water (0.22 mM) was found to have a  $P_{O_2}$  vs.  $C_{O_2}$  curve almost identical to that of sea water (Fig. 1). These data suggest that haemolymph  $C_{O_2}$  in the pedal sinus may be lower for two reasons. Firstly, haemocyanin levels are so low in some animals that there is no significant enhancement of  $C_{O_2}^{max}$ . Secondly, when haemocyanin levels are higher, the pigment is nearly completely deoxygenated at *in vivo*  $P_{O_2}$  (Table 1).

An interesting aspect of the present data is the intrinsic variability in haemocyanin observable in the absorption spectra, haemolymph  $O_2$ -carrying capacity and  $P_{O_2}$  vs.  $C_{O_2}$  curves. van Holde & van Bruggen (1971) observe a similar variability in their review of the literature on a wide range of molluscs. *A. californica* examined in the present study seem to differ from other molluscs, however, in having a lower range of concentrations than in other species. Higher haemocyanin levels were observed in freshly collected animals and may also occur in other populations, at specific seasons, or under other environmental conditions. Neither the cause of this variability nor its effect on tissue oxygen supply can be assessed at this time.

Neurophysiologists utilizing the gill-mantle-siphon-abdominal ganglion preparation of *Aplysia* choose seawater as the most physiological saline because the two fluids are nearly isosmotic and isoionic (Hayes & Pelluet, 1947). The present data demonstrate that sea water and *Aplysia* haemolymph do, however, differ considerably with respect to acid-base characteristics and, in some animals, oxygen content. These differences in pH,  $C_{CO_2}$ ,  $P_{CO_2}$ , and  $C_{O_2}$  may affect specific neuronal activities, as demonstrated by Chalazonitis & Nahas, (1965) Brown (1972, 1974), Chalazonitis (1974) and Carpenter *et al.* (1974). These authors have clearly shown that pH,  $P_{CO_2}$ , and  $P_{O_2}$  may affect membrane potential, spike frequency, membrane resistance, specific ion conductances and whether or not a neurone is silent in identifiable cells of the abdominal ganglion in *Aplysia*. Although for the most part these studies have utilized changes of pH,  $P_{CO_2}$ , and  $P_{O_2}$  outside the physiological range, Brown (1974) points out that electrophysiological alterations do occur when more physiologically relevant levels of  $P_{CO_2}$  and pH are utilized. Furthermore, the effects of pH and  $P_{CO_2}$  changes are not the same for all cells: some cells are hyperpolarized, resulting in a reduced spike frequency upon administration of low pH or high  $P_{CO_2}$ , medium (Brown, 1974).

Chalazonitis & Arvanitaki (1970) have found that there is an inverse relationship between oxygen tension of the bathing medium and membrane potential and spike frequency of spontaneously active cells in the abdominal ganglion of *Aplysia fasciata*. Although postbranchial  $P_{O_2}$  was not measured in the present study, haemolymph bathing the abdominal ganglion is certainly not air-saturated ( $P_{O_2}$  133–159 torr), because of the diffusion barrier at the gill and because postbranchial (high  $P_{O_2}$ ) and renal haemolymph (low  $P_{O_2}$ ) are mixed in the heart before flowing to the abdominal ganglion. Use of air-saturated sea water as the bathing medium may elevate intracellular  $P_{O_2}$  enough to alter both membrane potential and possibly baseline spike frequencies. Certain changes in spike frequency or membrane potential observed upon changing the bathing medium may be due to alteration of oxygen levels or acid-base status in the solution rather than due to administration of an exogenous substance.

REFERENCES

- BATTERTON, C. V. & CAMERON, J. N. (1978). Characteristics of resting ventilation and response to hypoxia, hypercapnia and emersion in the blue crab, *Callinectes sapidus* (Rathbun). *J. exp. Zool.* **203**, 403-418.
- BAYNE, B. L. (1976). *Marine Mussels: Their Ecology and Physiology*, 506 pp. Cambridge University Press.
- BEVELAQUA, F. A., KIM, K. S., KUMARASIRI, M. H. & SCHWARTZ, J. H. (1975). Isolation and characterization of acetylcholinesterase and other particulate proteins in the hemolymph of *Aplysia californica*. *J. biol. Chem.* **250**, 731-783.
- BONAVENTURA, J. & BONAVENTURA, C. (1980). Hemocyanins: relationships in their structure, function and assembly. *Am. Zool.* **20**, 7-17.
- BROWN, A. M. (1972). Effects of CO<sub>2</sub> and pH on neuronal membranes. *Fed. Proc.* **31**, 1399-1403.
- BROWN, A. M. (1974). Carbon dioxide action on neuronal membranes. In *Carbon Dioxide and Metabolic Regulations* (ed. Nahas, G. and Schaefer, K. E.), pp. 81-86. Springer-Verlag.
- CAMERON, J. N. (1971). Rapid method for determination of total carbon dioxide in small blood samples. *J. appl. Phys.* **31**, 632-634.
- CARPENTER, D. O., HUBBARD, J. H., HUMPHREY, D. R., THOMPSON, H. K. & MARSHALL, W. H. (1974). Carbon dioxide effects on nerve cell function. In *Carbon Dioxide and Metabolic Regulations* (ed. Nahas, G. and Schaefer, K. E.), pp. 49-62. Springer-Verlag.
- CHALAZONITIS, N. (1974). Simultaneous recordings of pH, P<sub>CO<sub>2</sub></sub>, and neuronal activity during hypercapnic transients (identifiable neurons of *Aplysia*). In *Carbon Dioxide and Metabolic Regulations*, (ed. Nahas, G. and Schaefer, K. E.), pp. 63-80. Springer-Verlag.
- CHALAZONITIS, N. & ARVANITAKI, A. (1970). Neuromembrane electrogenesis during changes in P<sub>O<sub>2</sub></sub>, P<sub>CO<sub>2</sub></sub>, and pH. In *Biochemistry of Simple Neuronal Models*. (ed. Costa, E. and Giacobini, E.), pp. 245-288. Raven Press.
- CHALAZONITIS, N. & NAHAS, G. (1965). Small P<sub>CO<sub>2</sub></sub> change and neuronal synaptic activation. *Nature, Lond.* **205**, 1016-1017.
- DEFUR, P. L., WILKES, P. R. H. & McMAHON, B. R. (1980). Non-equilibrium acid base status in *C. productus*: role of exoskeletal carbonate buffers. *Resp. Physiol.* **42**, 247-261.
- GHIRETTI-MAGALDI, A., NUZZOLO, C. & GHIRETTI, F. (1966). Chemical studies on hemocyanins. I. Amino acid composition. *Biochem. J.* **5**, 1943-1951.
- HAYES, F. R. & PELLUET, D. (1947). The inorganic constitution of molluscan blood and muscle. *J. mar. biol. Ass. U.K.* **26**, 580-589.
- KANDEL, E. R. (1976). *Cellular Basis of Behavior*. San Francisco: W. H. Freeman.
- KANDEL, E. R. (1979). *Behavioral Biology of Aplysia*. San Francisco: W. H. Freeman.
- LUKOWIAK, K. (1980). CNS control over gill reflex behaviours in *Aplysia*: satiation causes an increase in the suppressive control in older but not young animals. *J. Neurobiol.* **11**, 591-611.
- MANGUM, C. P. & BURNETT, L. E. (1975). The extraction of oxygen by estuarine invertebrates. In *Physiological Ecology of Estuarine Organisms* (ed. F. J. Vernberg), pp. 147-164. Columbia, S.C.: University South Carolina Press.
- MANGUM, C. P. & POLITES, G. (1980). Oxygen uptake and transport in the prosobranch mollusc *Burycon canaliculatum* I. Gas exchange and the response to hypoxia. *Biol. Bull. mar. biol. Lab., Woods Hole* **158**, 77-90.
- McMAHON, B. R. & WILKENS, J. L. (1975). Respiratory and circulatory responses to hypoxia in the lobster *Homarus americanus*. *J. exp. Biol.* **62**, 637-655.
- NICKERSON, K. W. & VAN HOLDE, K. E. (1971). A comparison of molluscan and arthropod hemocyanin. I. Circular dichroism and absorption spectra. *Comp. Biochem. Physiol.* **398**, 855-872.
- TRUCHOT, J. P. (1976). Carbon dioxide combining properties of the blood of the shore crab, *Carcinus maenas* (L.): CO<sub>2</sub>-dissociation curves and the Haldane effect. *J. Comp. Physiol.* **112**, 283-293.
- VAN HOLDE, K. E. & VAN BRUGGEN, E. F. J. (1971). The Hemocyanins. In *Subunits in Biological Systems*, part A. (ed. S. N. Timasheff and G. D. Fasman), pp. 1-53. N.Y.: Marcel Dekker.
